# Supplementary material for: An iron(iii) oxide-anchored conductive polymer–graphene ternary nanocomposite decorated disposable paper electrode for non-enzymatic detection of serotonin
Source: Royal Society of Chemistry journal article supplement (doi:10.1039/d3ma00777d), 2023-12-11
Supplement: d3ma00777d1.pdf [file d3ma00777d1.pdf]

## Supporting Information

### Iron (III) Oxide anchored conductive polymer-graphene ternary nanocomposite decorated disposable paper electrodes for non-enzymatic detection of serotonin

*Sharmila Prashanth<sup>a</sup>, Raifa Abdul Aziz<sup>b</sup>, Shamprasad Varija Raghu<sup>b,c</sup>, Yoon-Bo Shim<sup>d</sup>, K. Sudhakara Prasad<sup>a,\*</sup>,  
Airody Vasudeva Adhikari<sup>a,e,\*</sup>*

<sup>a</sup> Nanomaterial Research Laboratory (NMRL), Nano Division, Yenepoya Research Centre and Centre for Nutrition Studies, Yenepoya (Deemed to be University), Deralakatte, Mangalore 575018, India

<sup>b</sup> Neurogenetics Lab, Department of Applied Zoology, Mangalore University, Mangalagangothri, Mangalore 574199, Karnataka, India

<sup>c</sup> Division of Neuroscience, Yenepoya Research Centre, Yenepoya (Deemed to be University), Deralakatte, Mangalore 575018, India

<sup>d</sup> Department of Chemistry and Institute of Biophysio Sensor Technology, Pusan National University, Busan 46241, Republic of Korea

<sup>e</sup> Department of Chemistry, National Institute of Technology Karnataka, Surathkal, Mangalore 575025, India

### Table of contents

| SL No. | Contents                                                           | Page No. |
|--------|--------------------------------------------------------------------|----------|
| 1      | Results and discussion<br>XPS characterization of the sensor       | 2        |
| 2      | FTIR characterization of the sensor                                | 3        |
| 3      | Selectivity and stability studies                                  | 3        |
| 4      | Raw DPV ad FTIR of 5-HT before and after electrochemical oxidation | 4        |
| 4      | Real sample analysis by HPLC-UV method                             | 5        |
| 5      | Recovery and comparison table                                      | 6        |
| 6      | References                                                         | 7        |

## RESULTS AND DISCUSSIONS

### XPS characterization of the sensor

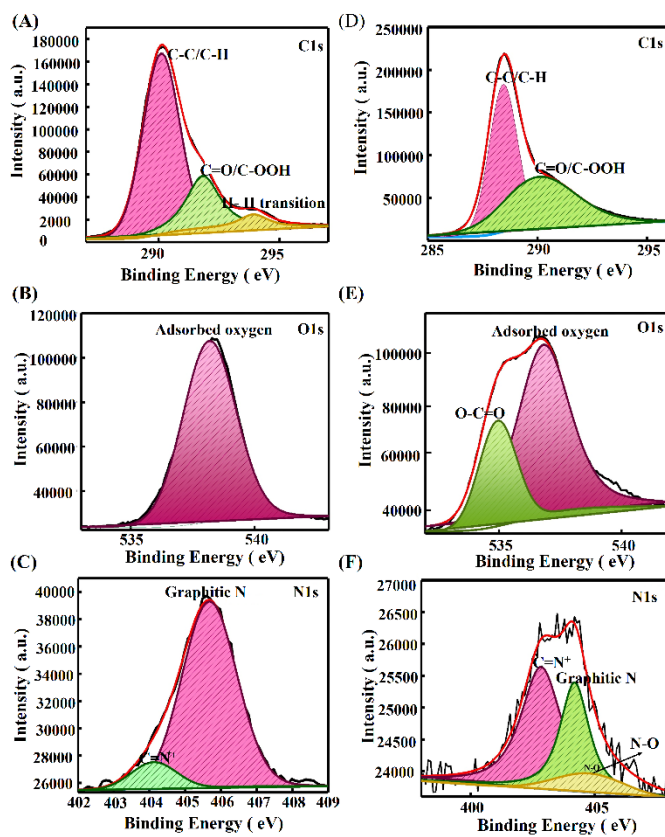

**Figure S1.** Deconvoluted C 1s, O 1s, N 1s XPS spectrum for **(A)** PPE-P (py) (A, B, and C) and **(B)** PPE-P (py) - rGO (D, E, and F).

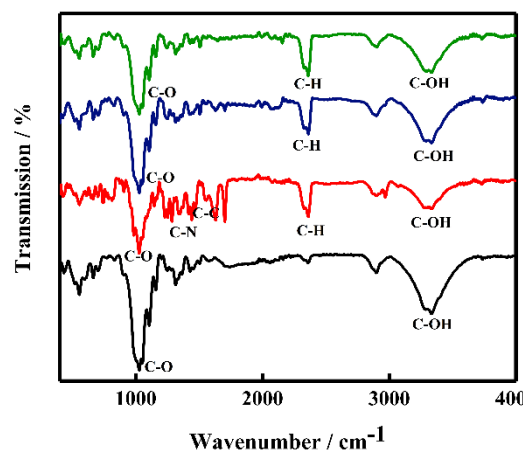

### FTIR characterization of the sensor

**Figure S2** FTIR spectrum obtained for PPE (black), PPE-P(py) (red), PPE-P(py)-rGO (blue), and PPE-P(py)-rGO-Fe<sub>2</sub>O<sub>3</sub> (green).

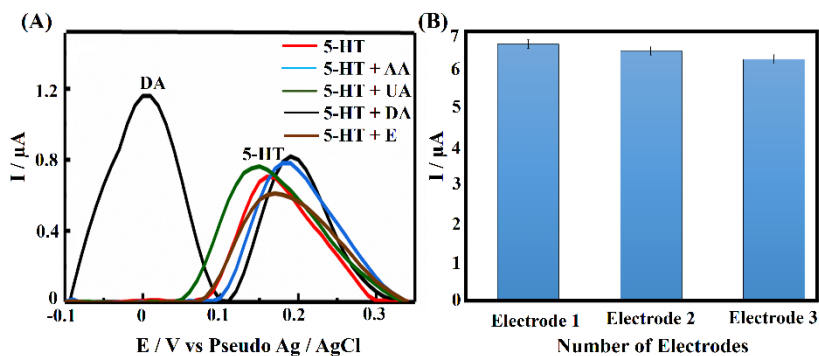

### Selectivity and stability studies

**Figure S3 (A)** Background subtracted DPV response for selectivity studies conducted for 5-HT at a concentration of 75 μM, with 75 μM concentrations of ascorbic acid (AA), uric acid (UA), dopamine (DA), and epinephrine (E) **(B)** Average current response for four electrodes recorded using DPV for 500 μM 5-HT.

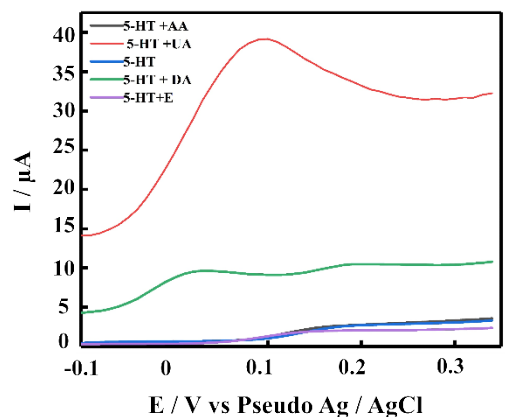

**Figure S4** Raw DPV response for selectivity studies conducted for 5-HT at a concentration of 75 μM, with 75 μM concentrations of ascorbic acid (AA), uric acid (UA), dopamine (DA), and

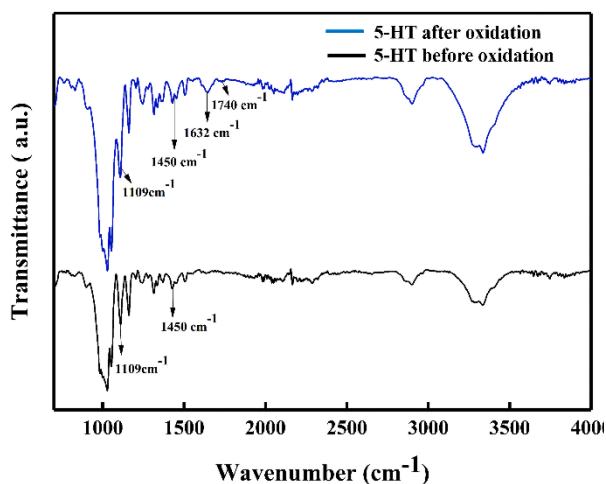

epinephrine (E) without background subtraction

**Figure S5** FTIR spectrum obtained for 5-HT before oxidation (blue) and after oxidation (black)

### Real sample analysis by HPLC-UV method

Chromatographic conditions used to determine the concentration of 5-HT are as follows (1).

Solution A: 0.1% formic acid in milli-Q water

Solution B: acetonitrile

Mobile phase: solution A: solution B (90:10%)

Column: shim-pack GIST 5C1g, 4.6\*250 mm

Elution method: Isocratic

Detector wavelength: 280 nm

Flow rate: 1.0 mL/min

Column oven temperature: 25°C

Run time: 8 min

Injection volume: 60  $\mu$ L

The concentration of 5-HT in *Drosophila melanogaster* was determined by comparing the peak area obtained from the real sample analysis with the peak area obtained from the standard 5-HT solution of known concentrations (Figure S4)

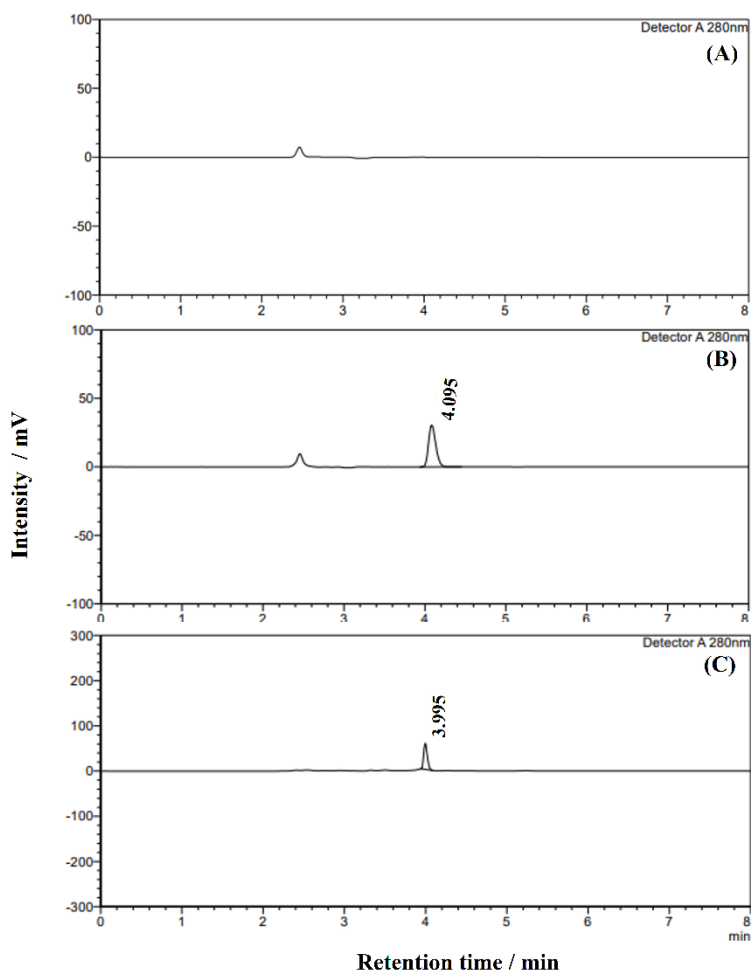

**Figure S6(A)** Chromatogram of blank solution **(B)** Chromatogram of standard 5-HT solution **(C)** Chromatogram of real sample solution.

**Table S1. Recovery analysis was carried out by standard addition method.**

| Sl. No | Actual conc. ( $\mu\text{M}$ ) | Calculated conc. ( $\mu\text{M}$ ) | % recovery |
|--------|--------------------------------|------------------------------------|------------|
| 1.     | 25                             | 25.0                               | 100        |
| 2.     | 50                             | 47.22                              | 99.4       |
| 3.     | 75                             | 81.38                              | 104.4      |
| 4.     | 100                            | 96.66                              | 96.7       |

**Table S2. Comparison of composition, detection limit and linear range of different modified electrodes for the determination of 5-HT.**

| Electrode type       | Modification                                                    | Electrode modification                            | LOD ( $\mu\text{M}$ )   | Linear range ( $\mu\text{M}$ ) | Real sample                                    | Ref       |
|----------------------|-----------------------------------------------------------------|---------------------------------------------------|-------------------------|--------------------------------|------------------------------------------------|-----------|
| GCE                  | Ag/PPy/Cu <sub>2</sub> O                                        | Sonochemical and oxidative polymerisation         | 0.0124                  | 0.01-250                       | -                                              | (2)       |
| SPE                  | MWCNT-AONP                                                      | Hydrothermal method                               | 0.0246                  | 0.016-0.16                     | Tomato                                         | (3)       |
| GCE                  | rGO-Co <sub>3</sub> O <sub>4</sub>                              | Hydrothermal                                      | 1.128                   | 1 - 10                         | -                                              | (4)       |
| GCE                  | MWCNT-NiO,<br>MWCNT-ZnO<br>MWCNT-Fe <sub>3</sub> O <sub>4</sub> | Drop – dry                                        | 0.118<br>0.129<br>0.166 | 0.0059–<br>62.8                | Urine                                          | (5)       |
| GCE                  | Fe <sub>3</sub> O <sub>4</sub> -MWCNT-poly(BCG)                 | Electropolymerisation followed by drop-dry method | 0.080                   | 0.5 - 100                      | Serum                                          | (6)       |
| Gold mylar substrate | rGO-PEDOT/PSS-nafion                                            | Drop cast method                                  | 0.1                     | 1 - 10                         | -                                              | (7)       |
| PPE                  | P(py)-rGO-Fe <sub>2</sub> O <sub>3</sub>                        | Amperometry, CV                                   | 0.022                   | 0.01-500                       | Brain sample of <i>Drosophila melanogaster</i> | This work |

## REFERENCES

- 1) He Q, Li M, Wang X, Xia Z, Du Y, Li Y, et al. A simple, efficient and rapid HPLC–UV method for the detection of 5-HT in RIN-14B cell extract and cell culture medium. *BMC Chem.* 2019 Jun 12;13(1):76.
- 2) Selvarajan S, Suganthi A, Rajarajan M. A novel highly selective and sensitive detection of serotonin-based on Ag/polypyrrole/Cu<sub>2</sub>O nanocomposite modified glassy carbon electrode. *Ultrason Sonochem.* 2018 Jun 1;44:319–30.
- 3) Motsaathebe PC, Fayemi OE. Serotonin electrochemical detection in tomatoes at MWCNT-AONP nanocomposite modified electrode. *Mater Res Express.* 2021 Nov;8(11):115004.
- 4) Shahid MM, Rameshkumar P, Numan A, Shahabuddin S, Alizadeh M, Khiew PS, et al. A cobalt oxide nanocubes interleaved reduced graphene oxide nanocomposite modified glassy carbon electrode for amperometric detection of serotonin. *Mater Sci Eng C.* 2019 Jul 1;100:388–95.
- 5) Fayemi OE, Adekunle AS, Ebenso EE. Electrochemical determination of serotonin in urine samples based on metal oxide nanoparticles/MWCNT on modified glassy carbon electrode. *Sens Bio-Sens Res.* 2017 Apr;13:17–27.
- 6) Ran G, Chen X, Xia Y. Electrochemical detection of serotonin based on a poly(bromocresol green) film and Fe<sub>3</sub>O<sub>4</sub> nanoparticles in a chitosan matrix. *RSC Adv.* 2017;7(4):1847–51.
- 7) Al-Graiti W, Foroughi J, Liu Y, Chen J. Hybrid Graphene/Conducting Polymer Strip Sensors for Sensitive and Selective Electrochemical Detection of Serotonin. *ACS Omega.* 2019 Dec 24;4(26):22169–77.

\* \* \* \* \*
